# Supplementary material for: Oat bran β-glucan improves glucose homeostasis in mice fed on a high-fat diet
Source: Royal Society of Chemistry journal article supplement (doi:10.1039/c7ra10437e), 2017-01-01
Supplement: c7ra10437e1.pdf [file c7ra10437e1.pdf]

Table S1. The composition of the treatment diets.

| Ingredient            | LF    | HF    | HFGF   | HFEX  |
|-----------------------|-------|-------|--------|-------|
| Oat bran              | 0     | 0     | 260.0  | 0     |
| $\beta$ -glucan       | 0     | 0     | 0      | 45.4* |
| Casein                | 140.0 | 183.6 | 134.2  | 183.6 |
| starch                | 465.7 | 171.6 | 68.5   | 171.6 |
| maltodextrin          | 155.0 | 59.5  | 59.5   | 59.5  |
| Sucrose               | 100.0 | 261.8 | 261.8  | 261.8 |
| Soybean oil           | 40.0  | 29.7  | 0.2    | 29.7  |
| Anhydrous cream       | 0     | 174.2 | 174.2  | 174.2 |
| Cellulose             | 50.0  | 59.5  | 0      | 54.1  |
| vitamins+minerals mix | 45.0  | 53.5  | 53.5   | 53.5  |
| L-Cystine             | 3.0   | 3.6   | 3.6    | 3.6   |
| Choline chloride      | 2.5   | 3.0   | 3.0    | 3.0   |
| Total                 | 1000  | 1000  | 1018.5 | 1040  |
| Energy, Kcal/g        | 3.8   | 4.5   | 4.4    | 4.3   |

Note:

HFBF: the content of starch, lipids and protein from prepared oat flour(260g) are 103.0 g, 29.2g, 50.5g, respectively. \*: the amount is converted from the purity of extracted  $\beta$ -glucan. Energy ratio for LF diet: carbohydrate 75.0%, fat 10.3%, protein 15.0%;

Energy ratio for high-fat diet: carbohydrate 44.0%, fat 41.0%, protein 15.0%.

Table S2. The insulin resistance (HOMA-IR) and sensitivity (ISI).

| Treatment | FINS                     | ISI                      | HOMA-IR                  |
|-----------|--------------------------|--------------------------|--------------------------|
| LF        | 1.849±0.021 <sup>a</sup> | 1.083±0.021 <sup>a</sup> | 0.339±0.014 <sup>a</sup> |
| HF        | 2.424±0.009 <sup>b</sup> | 0.670±0.038 <sup>b</sup> | 0.512±0.021 <sup>b</sup> |
| HFEF8     | 1.810±0.014 <sup>a</sup> | 1.156±0.031 <sup>c</sup> | 0.315±0.039 <sup>a</sup> |

\*Note: HFEF8: HFEF with addition of 8% extracted  $\beta$ -glucan. Different letters represent statistical significant differences at  $p < 0.05$ .

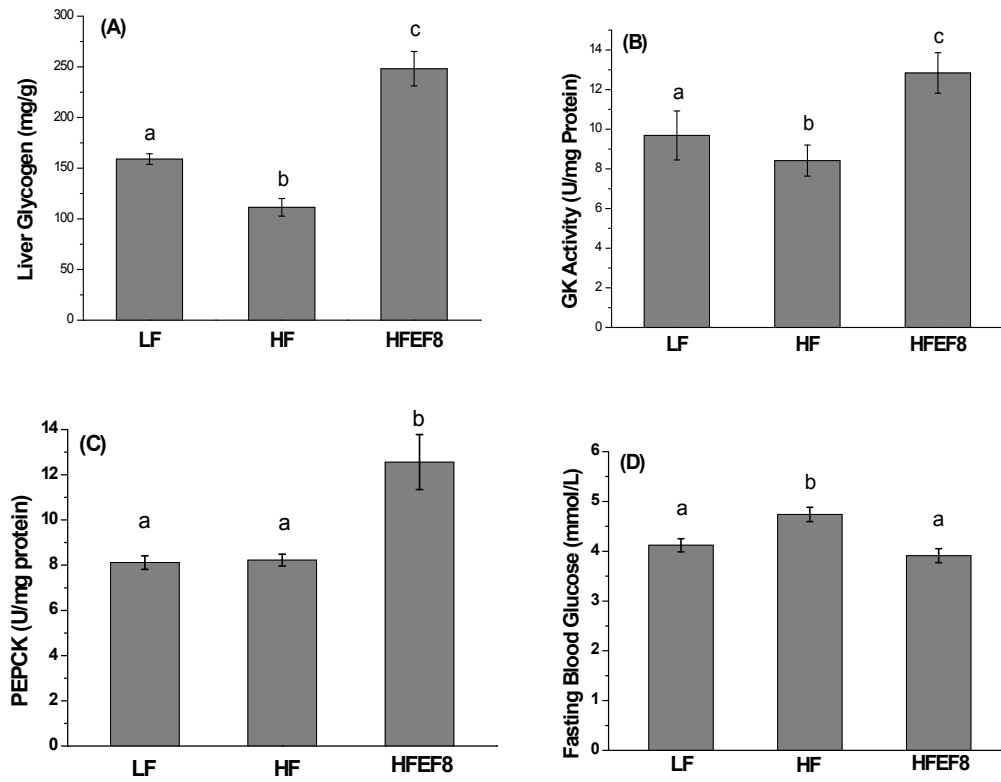

Figure S1. The changes of liver glycogen, hepatic GK activity, intestinal PEPCK activity and fasting blood glucose in mice fed on HFEF diet containing 8% extracted  $\beta$ -glucan. Different letters represent statistic significant difference at  $p < 0.05$ .
